# Supplementary material for: Global Land Use Impacts of Bioeconomy: An Econometric Input–Output Approach
Source: MDPI journal article supplement (doi:10.3390/su14041976), 2022-02-09
Supplement: s1 [file s1]

Archive with 1 entries (1 files):
- sustainability-1539809-supplementary.pdf
