# Supplementary material for: Global Land Use Impacts of Bioeconomy: An Econometric Input–Output Approach
Source: MDPI journal article supplement (doi:10.3390/su14041976), 2022-02-09
Supplement: s1 [file s1 › sustainability-1539809-supplementary.pdf]

Supplementary Materials

# Global Land Use Impacts of Bioeconomy: An Econometric Input–Output Approach

Johannes Reinhard Többen <sup>1,2\*</sup>, Martin Distelkamp <sup>1</sup>, Britta Stöver <sup>1</sup>, Saskia Reuschel <sup>1</sup>, Lara Ahmann <sup>1</sup> and Christian Lutz <sup>1</sup>

<sup>1</sup> Gesellschaft für Wirtschaftliche Strukturforchung (GWS) mbH, Osnabrück, Germany; [toebben@gws-ows.com](mailto:toebben@gws-ows.com) (J.T.); [distelkamp@gws-os.com](mailto:distelkamp@gws-os.com) (M.D.); [stoever@gws-os.com](mailto:stoever@gws-os.com) (B.S.); [reuschel@gws-os.com](mailto:reuschel@gws-os.com) (S.R.); [ahmann@gws-os.com](mailto:ahmann@gws-os.com) (L.A.); [lutz@gws-os.com](mailto:lutz@gws-os.com) (C.L.)

<sup>2</sup> Social Metabolism & Impacts, Potsdam Institute for Climate Impact Research, Member of the Leibniz Association, Potsdam, Germany; [toebben@gws-os.com](mailto:toebben@gws-os.com) (J.T.)

\* Correspondence: [toebben@gws-os.com](mailto:toebben@gws-os.com)

**Citation:** Többen, J.R.; Distelkamp, M.; Stöver, B.; Reuschel, S.; Ahmann, L.; Lutz, C. Global Land Use Impacts of Bioeconomy: An Econometric Input–Output Approach. *Sustainability* **2022**, *14*, 1976. <https://doi.org/10.3390/su14041976>

Academic Editor: Agnieszka Bieda

Received: 20 December 2021

Accepted: 2 February 2022

Published: 16 February 2022

**Publisher’s Note:** MDPI stays neutral with regard to jurisdictional claims in published maps and institutional affiliations.

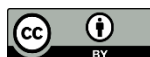

**Copyright:** © 2022 by the authors.

Licensee MDPI, Basel, Switzerland.

This article is an open access article distributed under the terms and conditions of the Creative Commons Attribution (CC BY) license (<https://creativecommons.org/licenses/by/4.0/>).

**Table S1.** Crops and livestock products distinguished in the agriculture module.

| <b>Crops</b> |                           | <b>Livestock Products</b> |                         |
|--------------|---------------------------|---------------------------|-------------------------|
| 1            | Wheat                     | 1                         | Cattle and buffalo meat |
| 2            | Maize                     | 2                         | Pig meat                |
| 3            | Rice                      | 3                         | Poultry meat            |
| 4            | Other cereals             | 4                         | Other meat              |
| 5            | Grapes                    | 5                         | Milk                    |
| 6            | Other fruits              | 6                         | Eggs                    |
| 7            | Soybeans                  | 7                         | Wool and silk           |
| 8            | Rapeseed and mustard seed | 8                         | Honey and beeswax       |
| 9            | Palm fruit oil            |                           |                         |
| 10           | Other oil crops           |                           |                         |
| 11           | Pulses                    |                           |                         |
| 12           | Spices                    |                           |                         |
| 13           | Potatoes                  |                           |                         |
| 14           | Other starchy roots       |                           |                         |
| 15           | Stimulants                |                           |                         |
| 16           | Sugar crops               |                           |                         |
| 17           | Tree nuts                 |                           |                         |
| 18           | Onions and tomatoes       |                           |                         |
| 19           | Other vegetables          |                           |                         |
| 20           | Fibers                    |                           |                         |

Source: own elaboration.

Table S2. Mid-layer coefficients of the agriculture module.

| Aggregate Commodity Basket | Use Category                  | $\log(\alpha)$ | $\log(fx)$ | $\beta_1 \log(v_1)$ | $\beta_2 \log(v_2)$ | $\gamma \log(\text{price})$ | R <sup>2</sup> | Info                                                                                                                                     |
|----------------------------|-------------------------------|----------------|------------|---------------------|---------------------|-----------------------------|----------------|------------------------------------------------------------------------------------------------------------------------------------------|
| Basic food crops           | Food use                      | 4.073 ***      | −1 ***     | 0.242 ***           | −0.016 ***          |                             | 0.950          | v1 = total domestic price-deflated per capita demand, agriculture<br>v2 = v1 * price                                                     |
|                            | Feed use                      | −0.398 ***     | −1.01 ***  | 1.017 ***           | 0.051 ***           | −0.335 ***                  | 0.960          | v1 = total weighted production quantity primary livestock<br>v2 = share of pig meat in total production quantity primary livestock       |
| Feed and food cereals      | Food use                      | −2.529 ***     | −1.005 *** | 0.934 ***           |                     | −0.445 ***                  | 0.977          | v1 = use of basic food crops                                                                                                             |
|                            | Processing and other non-food | 4.104 ***      | −1.072 *** | 0.393 ***           |                     | −0.381 ***                  | 0.876          | v1 = price-deflated use of agricultural products in manufacture of petroleum products, chemical products and rubber and plastic products |
| Fruits and vegetables      | Food use                      | 4.377 ***      | −1.001 *** | 0.212 ***           |                     | −0.227 ***                  | 0.964          | v1 = total domestic price-deflated per capita demand, agriculture                                                                        |
|                            | Feed use                      | −3.324 ***     | −1.001 *** | 0.939 ***           | 0.08 **             | −0.23 ***                   | 0.828          | v1 = total weighted production quantity primary livestock<br>v2 = share of pig meat in total production quantity primary livestock       |
| Oil crops                  | Food use                      | −2.194 ***     | −1.009 *** | 0.96 ***            |                     | −0.385 ***                  | 0.973          | v1 = use of basic food crops                                                                                                             |
|                            | Processing and other non-food | 5.171 ***      | −1.063 *** | 0.612 ***           |                     | −0.619 ***                  | 0.900          | v1 = price-deflated use of agricultural products in manufacture of petroleum products, chemical products and rubber and plastic products |
| Sugar crops                | Processing and other non-food | −1.041 ***     | −1.038 *** | 0.689 ***           |                     | −0.711 ***                  | 0.903          | v1 = price-deflated use of agricultural products in manufacture of petroleum products, chemical products and rubber and plastic products |

|                             |                               |            |           |           |            |            |       |                                                                                                  |
|-----------------------------|-------------------------------|------------|-----------|-----------|------------|------------|-------|--------------------------------------------------------------------------------------------------|
| Fiber crops                 | Processing and other non-food | 1.679 ***  | −1.09 *** | 0.72 ***  |            | −0.623 *** | 0.876 | v1 = price-deflated use of agricultural products in manufacture of textiles and clothing apparel |
| Spices, stimulants and nuts | Food use                      | 1.445 ***  | −1 ***    | 0.306 *** |            | −0.38 ***  | 0.912 | v1 = total domestic price-deflated per capita demand, agriculture                                |
| Meat                        | Food use                      | 1.841 ***  | −1 ***    | 0.594 *** | −0.017 *** | −0.369 *** | 0.976 | v1 = total domestic price-deflated per capita demand, agriculture<br>v2 = v1 * price             |
| Milk                        | Food use                      | −1.764 *** | −1 ***    | 1.148 *** | −0.084 *** |            | 0.987 | v1 = total domestic price-deflated per capita demand, agriculture<br>v2 = v1 * price             |
| Eggs                        | Food use                      | 2.132 ***  | −1 ***    | 0.121 *** |            | −0.153 *** | 0.908 | v1 = total domestic price-deflated per capita demand, agriculture                                |

Source: own calculations, *p*-value: < 0.1, \* <0.05, \*\* <0.01, \*\*\* <0.001.

Table S3. Bottom-layer coefficients of the agriculture module.

| Aggregate Commodity Basket  | Crops                     | log( $\alpha$ ) | log( $f_x$ ) | $\gamma$ log(price) | R <sup>2</sup> |
|-----------------------------|---------------------------|-----------------|--------------|---------------------|----------------|
| Basic food crops            | Wheat                     | −1.149 ***      | −1.001 ***   | −0.446 ***          | 0.933          |
|                             | Rice                      | −2.27 ***       | −1.033 ***   | −1.09 ***           | 0.911          |
|                             | Pulses                    | −3.679 ***      | −1 ***       | −0.259 ***          | 0.776          |
|                             | Potatoes                  | −1.883 ***      | −1.015 ***   | −0.787 ***          | 0.947          |
|                             | Other starchy roots       | −4.559 ***      | −1.014 ***   | −1.912 ***          | 0.902          |
| Feed and food cereals       | Maize                     | −0.896 ***      | −1.052 ***   | −1.674 ***          | 0.890          |
|                             | Other cereals             | −1.448 ***      | −1.073 ***   | −1.125 ***          | 0.891          |
| Fruits and vegetables       | Grapes                    | −2.702 ***      | −1.055 ***   | −1.148 ***          | 0.890          |
|                             | Other fruits              | −0.846 ***      | −1 ***       | −0.018 **           | 0.884          |
|                             | Onions and tomatoes       | −2.214 ***      | −1 ***       | −0.191 ***          | 0.953          |
|                             | Other vegetables          | −1.221 ***      | −1.002 ***   | −0.189 ***          | 0.926          |
| Oil crops                   | Soybeans                  | −1.168 ***      | −1.004 ***   | −0.593 ***          | 0.794          |
|                             | Rapeseed and mustard seed | −3.071 ***      | −1.036 ***   | −1.1 ***            | 0.837          |
|                             | Palm fruit oil            | −2.153 ***      | −1.001 ***   | −0.23 ***           | 0.793          |
|                             | Other oil crops           | −1.34 ***       | −1.008 ***   | −0.77 ***           | 0.841          |
| Spices, stimulants and nuts | Spices                    | −2.415 ***      | −1.004 ***   | −0.4 ***            | 0.845          |
|                             | Stimulants                | −0.488 ***      | −1.001 ***   | −0.158 ***          | 0.863          |
|                             | Tree nuts                 | −2.282 ***      | −1.007 ***   | −0.425 ***          | 0.890          |
| Meat                        | Cattle and buffalo meat   | −1.456 ***      | −1.003 ***   | −0.902 ***          | 0.941          |
|                             | Pig meat                  | −1.566 ***      | −1 ***       | −0.509 ***          | 0.970          |
|                             | Poultry meat              | −1.322 ***      | −1.004 ***   | −0.462 ***          | 0.818          |
|                             | Other meat                | −3.437 ***      | −1.005 ***   | −0.094 ***          | 0.942          |

Source: own calculations,  $p$ -value: <0.1, \* <0.05, \*\* <0.01, \*\*\* <0.001.

Table S4. Estimation results of the structural gravity model.

|    | Crops                     | log(dist) |  | lang = 1  |  | lang = 0 |  | same_cou = 1 |  | R <sup>2</sup> (McFadden) |
|----|---------------------------|-----------|--|-----------|--|----------|--|--------------|--|---------------------------|
| 1  | Wheat                     | −1.28 *** |  | 8.74 ***  |  | 9.21 *** |  | 3.71 ***     |  | 0.992                     |
| 2  | Maize                     | −1.65 *** |  | 9.73 ***  |  | 9.92 *** |  | 5.35 ***     |  | 0.994                     |
| 3  | Rice                      | −1.61 *** |  | 3.75      |  | 3.52     |  | 4.99 ***     |  | 0.998                     |
| 4  | Other cereals             | −1.49 *** |  | 1.07 ***  |  | 1.03 *** |  | 3.69 ***     |  | 0.991                     |
| 5  | Grapes                    | −1.12 *** |  | 6.85 ***  |  | 6.59 *** |  | 4.37 ***     |  | 0.993                     |
| 6  | Other fruits              | −1.35 *** |  | 10.01 *** |  | 9.84 *** |  | 3.17 ***     |  | 0.991                     |
| 7  | Soybeans                  | −1.09 *** |  | 4.34 *    |  | 4.67     |  | 4.32 ***     |  | 0.991                     |
| 8  | Rapeseed and mustard seed | −1.37 *** |  | 7.82 ***  |  | 8.68 *** |  | 3.74 ***     |  | 0.985                     |
| 9  | Palm fruit oil            | −6.63 *** |  | 1.39      |  | 1.37     |  | 4.31 ***     |  | 0.995                     |
| 10 | Other oil crops           | −1.19 *** |  | 6.75 ***  |  | 5.64 *** |  | 3.72 ***     |  | 0.995                     |
| 11 | Pulses                    | −0.82 *** |  | 4.91 ***  |  | 4.34 *** |  | 3.86 ***     |  | 0.991                     |
| 12 | Spices                    | −0.81 *** |  | 2.81 ***  |  | 2.62 *** |  | 2.89 ***     |  | 0.973                     |
| 13 | Potatoes                  | −1.02 *** |  | 7.82 ***  |  | 6.91 *** |  | 3.48 ***     |  | 0.999                     |
| 14 | Other starchy roots       | −1.64 **  |  | 2.41      |  | 1.37     |  | 4.75 ***     |  | 0.999                     |
| 15 | Stimulants                | −7.95 *** |  | 5.04 ***  |  | 4.61 *** |  | 2.83 ***     |  | 0.971                     |

|    |                         |       |     |       |     |       |     |      |     |       |
|----|-------------------------|-------|-----|-------|-----|-------|-----|------|-----|-------|
| 16 | Sugar crops             | −2.32 |     | 1.27  |     | 1.26  |     | 6.16 |     | 0.999 |
| 17 | Tree nuts               | −1.06 | *** | 4.81  | *** | 4.38  | *** | 3.01 | *** | 0.987 |
| 18 | Onions and tomatoes     | −1.41 | *** | 8.25  | *** | 7.91  | *** | 3.48 | *** | 0.995 |
| 19 | Other vegetables        | −1.76 | *** | 1.11  | *** | 1.06  | *** | 3.36 | *** | 0.998 |
| 20 | Fibers                  | −0.74 | *** | 1.71  | *   | 1.83  | .   | 4.81 | *** | 0.995 |
| 21 | Cattle and buffalo meat | −7.05 | *** | 3.72  | *** | 3.79  | *** | 4.68 | *** | 0.996 |
| 22 | Pig meat                | −1.58 | *** | 6.95  | *** | 6.71  | *** | 4.25 | *** | 0.997 |
| 23 | Poultry meat            | −1.05 | *** | 5.87  | *** | 5.86  | *** | 3.94 | *** | 0.992 |
| 24 | Other meat              | −0.86 | *** | 3.71  | *** | 2.35  | *** | 3.14 | *** | 0.983 |
| 25 | Milk                    | −0.85 | *** | 7.37  | *** | 6.43  | *** | 4.61 | *** | 0.999 |
| 26 | Eggs                    | −1.51 | *** | 7.45  | *** | 7.88  | *** | 4.22 | *** | 0.998 |
| 27 | Wool and silk           | −0.98 | *** | −3.41 |     | −8.21 |     | 3.56 | *** | 0.981 |
| 28 | Honey and beeswax       | −0.78 | *** | 2.91  | *** | 2.52  | *** | 3.13 | *** | 0.939 |

Source: own elaboration, *p*-value: <0.1, \* <0.05, \*\* <0.01, \*\*\* <0.001.

**Table S5.** Estimation results of the exporter fixed effects.

|                | Estimate  | Std. Error | t Value | Pr(> t )                  |
|----------------|-----------|------------|---------|---------------------------|
| log(YIELD_REL) | 0.355189  | 0.062832   | 5.653   | $1.61 \times 10^{-8}$ *** |
| log(PRDP/100)  | −0.173228 | 0.057888   | 2.992   | 0.002772 **               |
| TIME           | 0.031654  | 0.003681   | 8.600   | $<2 \times 10^{-16}$ ***  |

Residual standard error: 0.9997 on 14,468 degrees of freedom; multiple R-squared: 0.9048, adjusted R-squared: 0.8953; F-statistic: 94.53 on 1455 and 14,468 Dfs, *p*-value:  $<2.2 \times 10^{-16}$ . Source: own calculations, *p*-value: <0.1, \* <0.05, \*\* <0.01, \*\*\* <0.001.

**Table S6.** Estimation results of the importer fixed effects.

|         | Estimate               | Std. Error             | t Value | Pr(> t )                 |
|---------|------------------------|------------------------|---------|--------------------------|
| log(QD) | $6.938 \times 10^{-1}$ | $1.774 \times 10^{-2}$ | 39.102  | $<2 \times 10^{-16}$ *** |

Residual standard error: 0.9277 on 16,479 degrees of freedom; multiple R-squared: 0.8763, adjusted R-squared: 0.8633; F-statistic: 67.66 on 1725 and 16,479 Dfs, *p*-value:  $<2.2 \times 10^{-16}$ . Source: own calculations, *p*-value: <0.1, \* <0.05, \*\* <0.01, \*\*\* <0.001.

**Table S7.** List of countries and country groups used in the model.

| Country Group    | Countries                                                                                                                                                                                                                                                                                                                              |
|------------------|----------------------------------------------------------------------------------------------------------------------------------------------------------------------------------------------------------------------------------------------------------------------------------------------------------------------------------------|
| Africa           | Morocco, Tunisia, South Africa                                                                                                                                                                                                                                                                                                         |
| Asia and Pacific | Australia, Brunei, Cambodia, Indonesia, Israel, Japan, Kazakhstan, Korea, Malaysia, New Zealand, the Philippines, Saudi Arabia, Singapore, Thailand                                                                                                                                                                                    |
| Brazil           | Brazil                                                                                                                                                                                                                                                                                                                                 |
| China            | China, Chinese Taipei, Hong Kong                                                                                                                                                                                                                                                                                                       |
| Europe           | Austria, Belgium, Bulgaria, Croatia, Cyprus, the Czech Republic, Denmark, Estonia, Finland, France, Germany, Greece, Hungary, Iceland, Ireland, Italy, Latvia, Lithuania, Luxembourg, Malta, the Netherlands, Norway, Poland, Portugal, Romania, the Slovak Republic, Slovenia, Spain, Sweden, Switzerland, Turkey, the United Kingdom |
| India            | India                                                                                                                                                                                                                                                                                                                                  |
| North America    | Canada, Costa Rica, Mexico, United States                                                                                                                                                                                                                                                                                              |
| Russia           | The Russian Federation                                                                                                                                                                                                                                                                                                                 |
| South America    | Argentina, Chile, Peru                                                                                                                                                                                                                                                                                                                 |

**Table S8.** Area harvested for crops in million hectares for 2017 and 2040 (including absolute and relative differences between the bioeconomy and reference scenarios).

| Country Groups   | 2017 | Reference 2040 | Bioeconomy 2040 | Absolute Difference | Relative Difference |
|------------------|------|----------------|-----------------|---------------------|---------------------|
| Africa           | 21   | 22             | 23              | 2                   | 7.3%                |
| Asia and Pacific | 138  | 173            | 267             | 93                  | 53.9%               |
| Brazil           | 61   | 54             | 64              | 10                  | 18.9%               |
| China            | 216  | 204            | 263             | 59                  | 28.7%               |
| Europe           | 117  | 94             | 108             | 14                  | 14.8%               |
| India            | 191  | 175            | 186             | 11                  | 6.1%                |
| North America    | 123  | 108            | 134             | 26                  | 23.7%               |
| Russia           | 42   | 35             | 35              | 1                   | 2.0%                |
| South America    | 24   | 24             | 37              | 13                  | 52.9%               |

**Table S9.** GDP per capita for 2017, 2030 and 2040 (including absolute and relative differences between bioeconomy and reference scenarios).

| Country Groups   | 2017   | Reference | Bioeconomy | Absolute Difference | Relative Difference | Reference | Bioeconomy | Absolute Difference | Relative Difference |
|------------------|--------|-----------|------------|---------------------|---------------------|-----------|------------|---------------------|---------------------|
|                  | 2030   |           |            |                     |                     | 2040      |            |                     |                     |
|                  |        |           |            |                     |                     |           |            |                     |                     |
| Africa           | 5803   | 7476      | 7470       | −6                  | −0.1%               | 9769      | 9762       | −6                  | −0.1%               |
| Asia and Pacific | 14,778 | 21,003    | 21,095     | 91                  | 0.4%                | 27,203    | 27,471     | 269                 | 1.0%                |
| Brazil           | 10,944 | 15,752    | 15,720     | −33                 | −0.2%               | 20,227    | 20,164     | −62                 | −0.3%               |
| China            | 7503   | 14,604    | 14,603     | −1                  | 0.0%                | 19,774    | 19,787     | 14                  | 0.1%                |
| Europe           | 28,750 | 35,380    | 35,403     | 23                  | 0.1%                | 41,820    | 41,875     | 55                  | 0.1%                |
| India            | 1913   | 3911      | 3898       | −13                 | −0.3%               | 5922      | 5903       | −18                 | −0.3%               |
| North America    | 41,684 | 51,520    | 51,621     | 101                 | 0.2%                | 61,241    | 61,456     | 215                 | 0.4%                |
| Russia           | 7267   | 9515      | 9499       | −16                 | −0.2%               | 11,857    | 11,829     | −28                 | −0.2%               |
| South America    | 8904   | 9935      | 9964       | 29                  | 0.3%                | 11,002    | 11,033     | 30                  | 0.3%                |

**Table S10.** Percentage difference between the bioeconomy and reference scenarios for 2030 and 2040 for different aggregate production sectors and country groups.

| Production Sectors | Africa | Asia and Pacific | Brazil | China | Europe | India | North America | Russia | South America |
|--------------------|--------|------------------|--------|-------|--------|-------|---------------|--------|---------------|
| 2030               |        |                  |        |       |        |       |               |        |               |
| Agriculture        | −1.1   | 25.1             | −4.3   | 4.3   | 1.2    | −0.9  | 0.4           | −0.1   | −0.3          |
| Coke               | −0.1   | 0.5              | −0.2   | 0.0   | −0.3   | −0.2  | 0.0           | −0.4   | −0.1          |
| Electricity        | −0.1   | 0.7              | 0.0    | 0.2   | 0.1    | −0.3  | 0.0           | −0.1   | 0.0           |
| Food               | −0.4   | 6.1              | −2.0   | 0.9   | 0.6    | −1.0  | 0.2           | −0.1   | 0.3           |
| Mining             | −0.2   | 0.1              | 0.0    | −0.1  | 2.8    | −0.6  | −0.2          | −0.4   | 0.2           |
| Other industries   | −0.1   | 0.4              | −0.4   | 0.0   | 0.1    | −0.5  | 0.0           | −0.1   | −0.1          |
| Other services     | −0.1   | 0.0              | −0.3   | 0.0   | 0.1    | −0.2  | 0.0           | −0.2   | −0.1          |
| Transportation     | −0.1   | −0.5             | −0.3   | 0.0   | 0.1    | −0.2  | 0.0           | −0.2   | −0.1          |
| 2040               |        |                  |        |       |        |       |               |        |               |
| Agriculture        | −1.6   | 36.2             | −5.5   | 6.9   | 1.2    | −1.2  | −0.3          | −0.2   | −0.3          |
| Coke               | −0.1   | 1.3              | −0.2   | 0.1   | −0.8   | −0.1  | 0.1           | −0.6   | 0.0           |

|                  |      |      |      |     |     |      |      |      |      |
|------------------|------|------|------|-----|-----|------|------|------|------|
| Electricity      | −0.1 | 1.5  | −0.1 | 0.5 | 0.2 | −0.2 | 0.0  | 0.0  | 0.0  |
| Food             | −0.4 | 4.6  | −2.4 | 1.1 | 0.6 | −0.9 | 0.2  | 0.0  | 0.3  |
| Mining           | 0.0  | 0.7  | −0.5 | 0.1 | 0.4 | −0.1 | −0.4 | −2.4 | 0.9  |
| Other industries | −0.1 | 0.2  | −0.4 | 0.1 | 0.2 | −0.4 | 0.0  | −0.1 | 0.0  |
| Other services   | −0.1 | −0.4 | −0.4 | 0.1 | 0.2 | −0.1 | 0.0  | −0.2 | −0.1 |
| Transportation   | 0.0  | −1.0 | −0.2 | 0.1 | 0.2 | −0.1 | 0.0  | −0.2 | −0.1 |

Agriculture: Agriculture, forestry and fishing; Coke: Coke, refined petroleum, chemicals and pharmaceutical products; Electricity: Electricity, gas, water supply sewerage, waste and remediation services; Food: Food products, beverages and tobacco; Mining: Mining and extraction of energy producing products; Transportation: Transportation and storage.

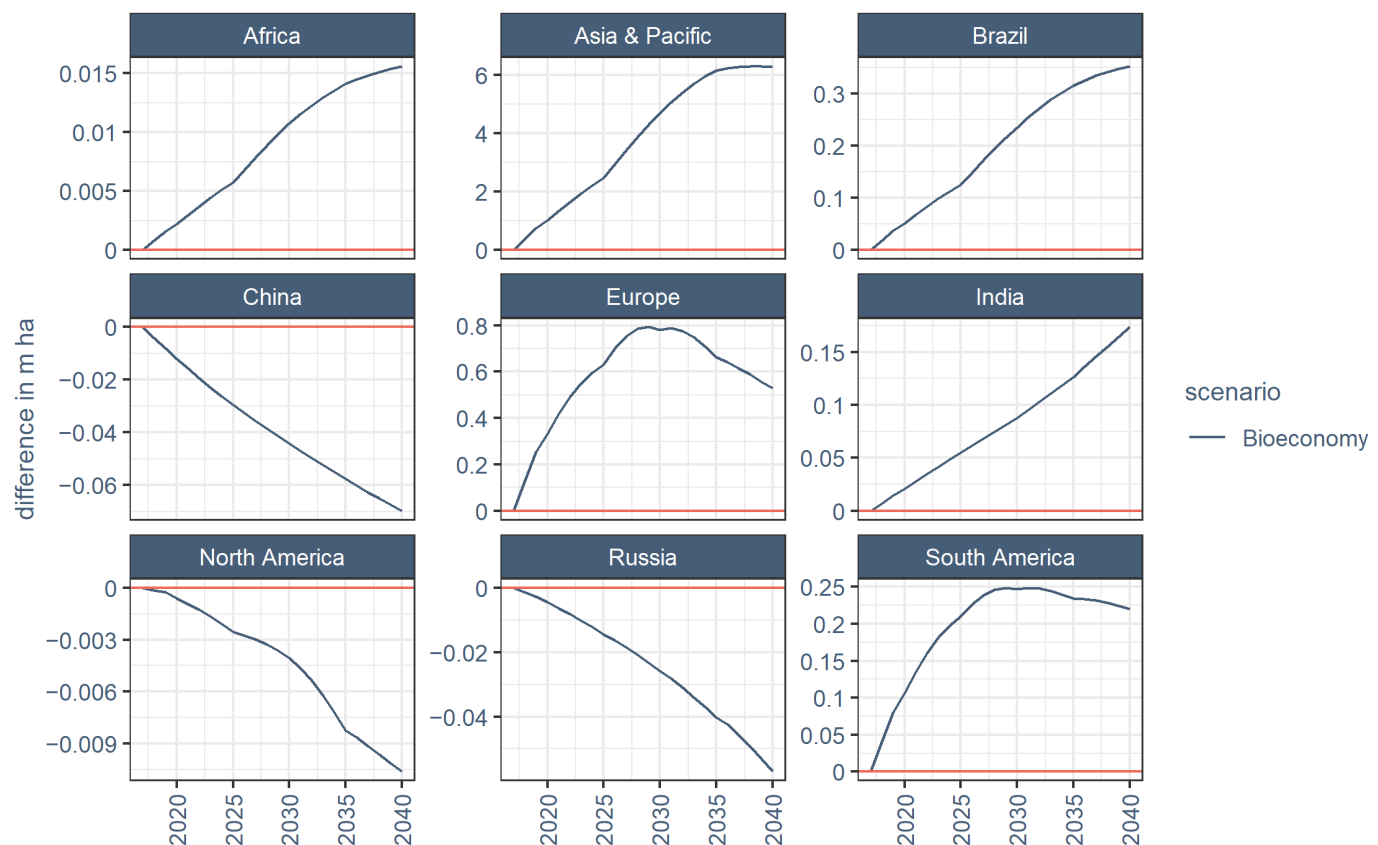

**Figure S1.** Absolute difference in area harvested for sugar between the reference and bioeconomy scenarios in million hectares.

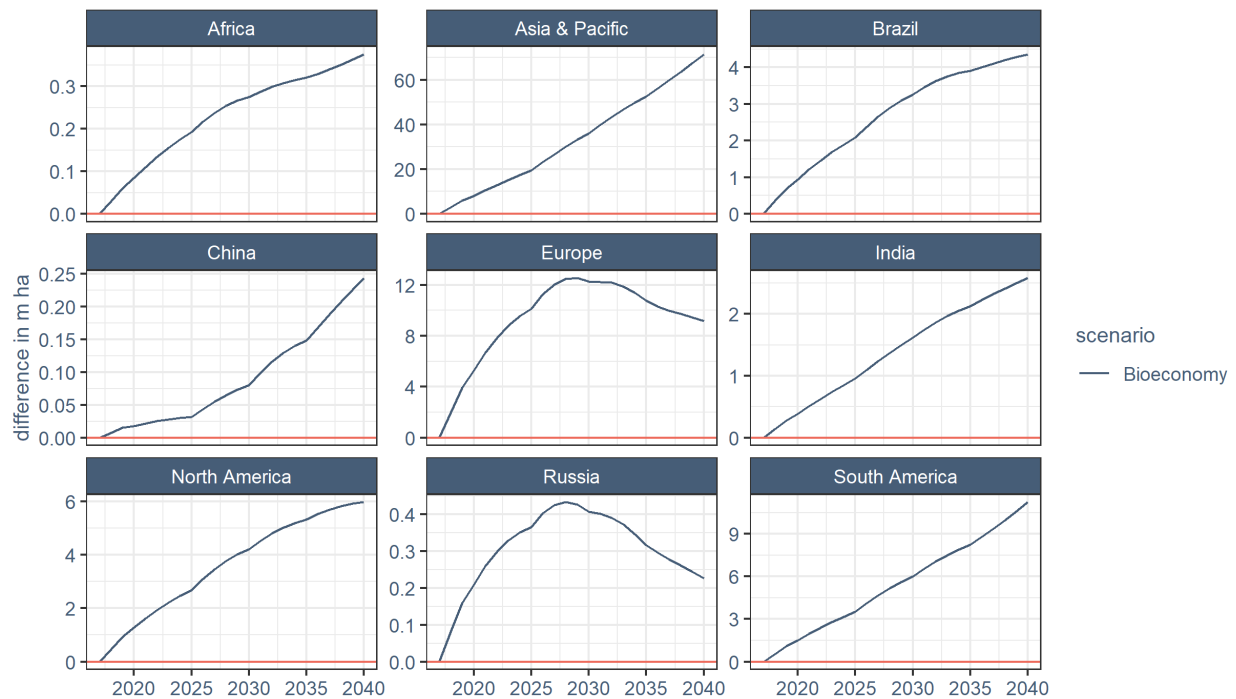

**Figure S2.** Absolute difference in area harvested for oleiferous fruits between the reference and bioeconomy scenarios in million hectares.

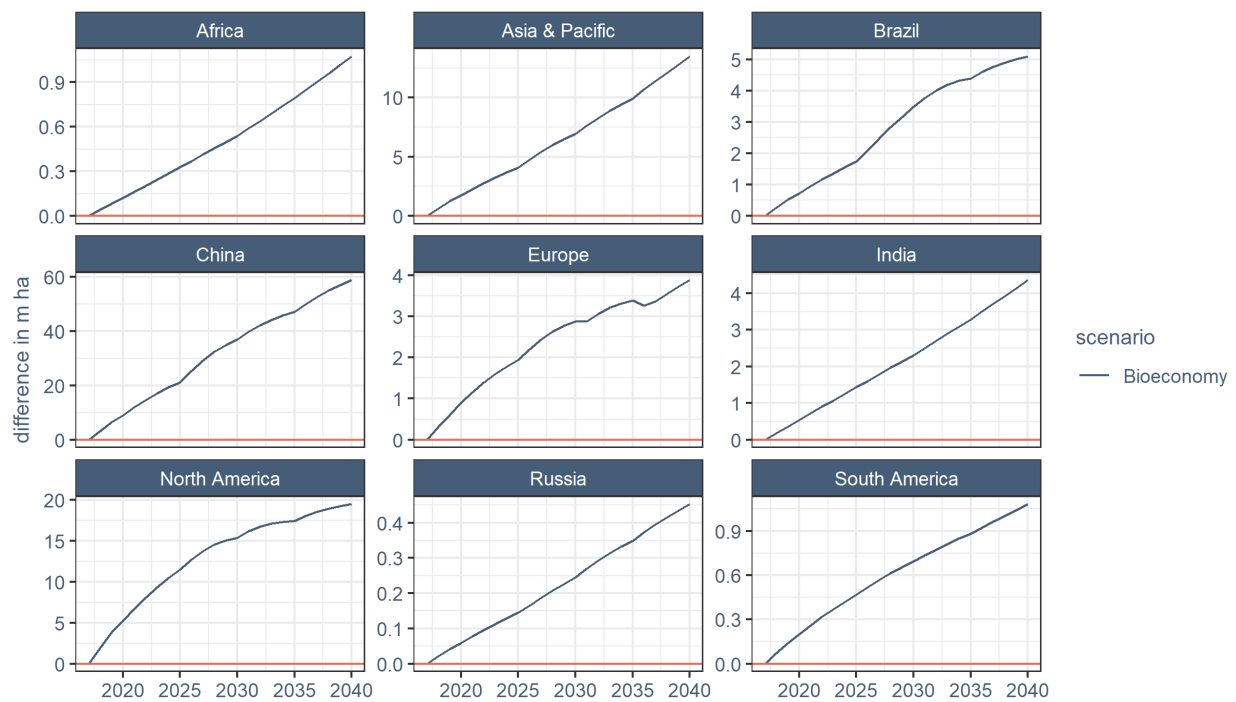

**Figure S3.** Absolute difference in area harvested for grains between the reference and bioeconomy scenarios in million hectares.
